# Supplementary material
Source: publisher figshare collection journal article supplement (https://acs.figshare.com/ndownloader/files/4213810)

# Supporting Information

## Synthesis of Azines in Solid State: Reactivity of Solid Hydrazine with Aldehydes and Ketones

Byeongno Lee,<sup>†</sup> Kyu Hyung Lee,<sup>†</sup> Jaeheung Cho,<sup>‡</sup> Wonwoo Nam,<sup>‡</sup> and Nam Hwi Hur<sup>\*,†</sup>

<sup>†</sup>Department of Chemistry, Sogang University, Seoul 121-742, Korea. <sup>‡</sup>Department of Bioinspired Science, Department of Chemistry and Nano Science, Ewha Womans University, Seoul 120-750, Korea,

\* e-mail: [nhhur@sogang.ac.kr](mailto:nhhur@sogang.ac.kr)

---

### Table of Contents

|                                                                                                                          |        |
|--------------------------------------------------------------------------------------------------------------------------|--------|
| 1. Experimental details                                                                                                  | S2     |
| 2. Instrumentation                                                                                                       | S2     |
| 3. General procedure for the preparation of azines in the solid state reactions between <b>1</b> and carbonyl compounds. | S4     |
| 4. Analytical data of azines obtained from the solid state reactions between <b>1</b> and carbonyl compounds.            | S6     |
| 5. References                                                                                                            | S11    |
| 6. Table S1. Structural data for single crystal of <b>3a</b>                                                             | S12    |
| 7. Table S2. Selected bond distances and bond angles (Å, °) of <b>3a</b>                                                 | S13-14 |
| 8. Table S3. Check CIF/PLATON report for <b>3a</b>                                                                       | S15-17 |
| 9. NMR data for <b>3a-3j</b>                                                                                             | S18-43 |

## 1. Experimental details

**Materials.** Hydrazine monohydrate ( $\text{NH}_2\text{NH}_2 \cdot \text{H}_2\text{O}$ ), 2-methoxycinnamaldehyde, 2 4-chlorobenzaldehyde, 4-bromobenzaldehyde, 4-hydroxybenzaldehyde, 4-hydroxy-3,5-dimethoxybenzaldehyde (syringaldehyde), 3-nitrobenzaldehyde, 4-nitrobenzaldehyde, 2-naphthaldehyde, 1-(3-nitrophenyl)ethanone, and 1-(4-methoxyphenyl)ethanone were purchased from Sigma-Aldrich, which were used without any further purification. Hydrazinium carboxylate (**1**) was prepared by the reaction of  $\text{NH}_2\text{NH}_2 \cdot \text{H}_2\text{O}$  with supercritical carbon dioxide.

## 2. Instrumentation

**General.** Powder X-ray diffraction patterns were recorded with a Rigaku DMAX 2500 diffractometer ( $\text{Cu K}\alpha$ ) operating at 40 kV and 150 mA. Nicolet 205 instrument was used to measure infrared spectra. Absorption spectra were recorded on an Agilent 8453 UV-visible spectrophotometer. Melting point was measured with a SMP10-BIBBY. GC/MS data were recorded on Agilent 5973N and elemental analyses were obtained using a Carlo Erba EA1180 at the Organic Chemistry Research Center in Sogang University. High resolution mass spectrum was collected on a JMS-700 (JEOL) using NBA (3-nitrobenzyl alcohol) as a matrix at the Korea Basic Science Institute.  $^1\text{H}$  NMR and  $^{13}\text{C}$  NMR spectra in solution were recorded on a Varian 400-MHz Gemini operating at 400 MHz for  $^1\text{H}$  and 100 MHz for  $^{13}\text{C}$ , respectively. All chemical shifts were referenced to tetramethylsilane.

**X-ray crystallography.** A single crystal of (2-OCH<sub>3</sub>)C<sub>6</sub>H<sub>4</sub>CH=N-N=CHC<sub>6</sub>H<sub>4</sub>(2-OCH<sub>3</sub>) was selected by a nylon loop (Hampton Research Co.) placed on a handmade cooper plate, which was placed inside a liquid N<sub>2</sub> Dewar vessel at approximately -40 °C and was mounted on a goniometer head in a N<sub>2</sub> cryostream. Data collections were carried out in a Bruker SMART AXS diffractometer equipped with a monochromator with a Mo K $\alpha$  ( $\lambda$  = 0.71073 Å) incident beam. The charge-coupled device data were integrated and scaled using the Bruker-SAINT software package, and the structure was solved and refined using SHELXTL V 6.12.<sup>S1</sup> Hydrogen atoms were located in the calculated positions. There are two independent but virtually identical molecules in the asymmetric unit. The crystal data for (2-OCH<sub>3</sub>)C<sub>6</sub>H<sub>4</sub>CH=CH-CH=N-N=CH-CH=CHC<sub>6</sub>H<sub>4</sub>(2-OCH<sub>3</sub>): C<sub>20</sub>H<sub>20</sub>N<sub>2</sub>O<sub>2</sub>, Monoclinic, *P*2(1)/*n*, *Z* = 4, *a* = 19.0367(6), *b* = 4.9902(2), *c* = 19.2908(7) Å,  $\beta$  = 108.317(2) °, *V* = 1728.37(11) Å<sup>3</sup>,  $\mu$  = 0.080 mm<sup>-1</sup>,  $\rho_{\text{calcd}}$  = 1.223 g/cm<sup>3</sup>, *R*<sub>1</sub> = 0.0387, and *wR*<sub>2</sub> = 0.0971 for 3368 unique reflections and 220 variables. The crystallographic data for (2-OCH<sub>3</sub>)C<sub>6</sub>H<sub>4</sub>CH=CH-CH=N-N=CH-CH=CHC<sub>6</sub>H<sub>4</sub>(2-OCH<sub>3</sub>) are listed in Table S1, while Table S2 lists the selected bond distances and angles. CCDC-844336 for (2-OCH<sub>3</sub>)C<sub>6</sub>H<sub>4</sub>CH=N-N=CHC<sub>6</sub>H<sub>4</sub>(2-OCH<sub>3</sub>) contains the supplementary crystallographic data for this paper (see also Table S3, Check CIF/PLATON report). These data can be obtained free of charge via [www.ccdc.cam.ac.uk/data\\_request/cif](http://www.ccdc.cam.ac.uk/data_request/cif) (or from the Cambridge Crystallographic Data Centre, 12, Union Road, Cambridge CB2 1EZ, UK; fax: (+44) 1223-336-033; or [deposit@ccdc.cam.ac.uk](mailto:deposit@ccdc.cam.ac.uk)).

**Precaution.** The solid hydrazine, hydrazinium carboxylate (**1**), could be harmful for health due to its sublimation character. The equipment of effective ventilation is highly recommended for handling the solid hydrazine to avoid vapor inhalation.

### 3. General procedure for the preparation of azines in the solid state reactions between **1** and carbonyl compounds.

A 10.0 mmol of carbonyl compound was mixed with 0.38 g of hydrazinium carboxylate (**1**, 5.0 mmole), which was then ground using a pestle and a mortar. After grinding at ambient temperature, the ground powder was stored in the closed vial. The ground mixture was heated at 60 °C until the reaction was complete. Complete conversion to azine was dependent upon the nature of carbonyl compounds. Typically aldehydes take about 5 h to complete the reactions while ketones take much longer (about 24 h). CO<sub>2</sub> and water were released from the reaction mixture. All azine derivatives obtained from the reactions of **1** with carbonyl compounds are characterized by <sup>1</sup>H and <sup>13</sup>C NMR spectroscopy. The products have over 97 % of purity of reaction mixture based on <sup>1</sup>H NMR spectroscopy and their isolation yields are over 97 % based on **1**. The melting points of all azine products were measured after purification with appropriate solvent.

#### Crystal growth of 1,2-bis((E)-3-(2-methoxyphenyl)allylidene)hydrazine (**3a**).

Single crystals were grown by dissolving the azines in appropriate solvents. For the growth of **3a** crystals, a chloroform solvent was added into the solid powder of 0.1 g until the powder was completely dissolved at ambient temperature, followed by addition of the similar amount of ether without mixing in a 10 mL vial. The resulting solution was carefully stored in the refrigerator for a day. Yellow crystals were grown from the

solution, which were separated by filtering and washing with pentane ( $3 \times 10$  mL).

**Synthesis of 1,2-bis((E)-3-(2-methoxyphenyl)allylidene)hydrazine (3a) by reaction of 2-methoxycinnamaldehyde with 1 at low and ambient temperature.**

A 10.0 mmol of 2-methoxycinnamaldehyde (**2a**) was mixed with 0.38 g of hydrazinium carboxylate (**1**, 5.0 mmole), which was then ground using a pestle and a mortar. After grinding at ambient temperature, the ground powder was divided into two parts, which were stored in two separate vials. One vial with a slightly loosen cap was left in the lab table and the other was stored in the refrigerator set at 4 °C. No agitation was made until the reactions were complete. The reaction progress was carefully monitored by  $^1\text{H}$  NMR spectroscopy (see Fig. S6).

**Synthesis of 1,2-bis((E)-3-(2-methoxyphenyl)allylidene)hydrazine (3a) by reaction of 2-methoxycinnamaldehyde with hydrazine hydrate in solution.**

A solution of hydrazine hydrate (0.267 g, 5.0 mmol) was slowly added for 10 min into a 10 mL of ether solution containing a 10.0 mmol (1.62 g) of 2-methoxycinnamaldehyde (**2a**), which was reacted for 5 h at room temperature. The azine (**3a**, ~75%) were obtained from the reaction along with about 12 % of unidentified compounds and about 13 % of un-reacted aldehyde, **2a**. The products were checked by  $^1\text{H}$  NMR spectroscopy (see Fig. S7).

**Synthesis of 1,2-bis((E)-3-(2-methoxyphenyl)allylidene)hydrazine (3a) by reaction of 2-methoxycinnamaldehyde in the absence of a solvent.**

A solution of hydrazine hydrate (0.267 g, 5.0 mmol) was slowly added for 10 min into a

10.0 mmol (1.62 g) of 2-methoxycinnamaldehyde (**2a**) without a solvent, which was reacted for 2 h at room temperature. The azine (**3a**, ~40%) were obtained from the reaction along with about 12 % of unidentified compounds and about 48 % of un-reacted aldehyde, **2a**. The products were checked by  $^1\text{H}$  NMR spectroscopy (see Fig. S8)..

#### 4. Analytical data of azines obtained from the solid state reactions between **1** and carbonyl compounds.

Analytical data are obtained from the purified samples. The purity is based on the  $^1\text{H}$  NMR spectrum.

**1,2-bis((E)-3-(2-methoxyphenyl)allylidene)hydrazine (3a).** Yield/purity (1.56 g, 97 />98%). mp 175 °C ( $\text{CHCl}_3$ /ether). Elemental analysis (Found: C, 75.13; H, 5.99; N, 8.53. Calc. For  $\text{C}_{20}\text{H}_{20}\text{N}_2\text{O}_2$ : C, 74.98; H, 6.29; N, 8.74 %).  $\lambda_{\text{max}}(\text{CHCl}_3)/\text{nm}$  370 ( $\epsilon/\text{dm}^3 \text{ mol}^{-1} \text{ cm}^{-1}$ ;  $5.75 \times 10^4$ ).  $\nu_{\text{max}}(\text{powder})/\text{cm}^{-1}$  1653w and 1558m,  $\nu(\text{C}=\text{C})$  and  $\nu(\text{C}=\text{N})$ .  $\delta_{\text{H}}$  (400 MHz;  $\text{CDCl}_3$ ;  $\text{Me}_4\text{Si}$ ) 3.90 (6H, s,  $\text{OCH}_3$ ), 6.92 (d,  $J = 8.4$  Hz, 2H, C-*H*, phenyl), 6.98 (t,  $J = 7.6$  Hz, 2H, C-*H*, phenyl), 7.16 (dd,  $J_{a,b} = 10.0$  Hz,  $J_{b,c} = 16.4$  Hz, 2H,  $\text{CH}_c=\text{CH}_b\text{CH}_a=\text{N}$ ), 7.32 (dd,  $J = 8.4$  Hz,  $J = 7.6$  Hz, 2H, C-*H*, phenyl), 7.42 (d,  $J_{b,c} = 16.4$  Hz, 2H, - $\text{CH}_c=\text{CH}_b$ -), 7.56 (d,  $J = 7.6$  Hz, 2H, C-*H*, phenyl), 8.38 (d,  $J_{a,b} = 10.0$  Hz, 2H,  $\text{CH}_a=\text{N}$ ).  $\delta_{\text{C}}$  (100 MHz;  $\text{CDCl}_3$ ;  $\text{Me}_4\text{Si}$ ) 55.5 ( $\text{OCH}_3$ ), 111.1 (CH-C=N), 120.8 (CH, phenyl), 124.8 ( $\text{C}_{\text{quart}}-1$ , phenyl), 125.9, 127.8, 130.67 (CHs, phenyl), 138.5 (Ph-CH=CH), 157.5 ( $\text{C}_{\text{quart}}-2$  phenyl), 164.3 (C=N) (see Fig. S1 – S5). MS (EI+)  $m/z = 320$  (100), 289 (75), 187 (97), 131 (33), 91 (22), 77 (14). HRMS (ES+) Calc. For  $\text{C}_{20}\text{H}_{21}\text{N}_2\text{O}_2$  ( $\text{M}+\text{H}$ ) $^+$   $m/z$  321.1603 ( $\text{M}^+$ ), Obsd. 321.1603.

**1,2-bis(4-chlorobenzylidene)hydrazine (3b).**

Yield/purity (1.35g, 97/>98%). mp 208-210 °C (CH<sub>2</sub>Cl<sub>2</sub>/ether), lit. 209-210 °C.<sup>S2</sup>

Elemental analysis (Found: C, 60.38; H, 3.50; N, 10.07. Calc. For C<sub>14</sub>H<sub>10</sub>Cl<sub>2</sub>N<sub>2</sub>: C, 60.67; H, 3.64; Cl, 25.58; N, 10.11 %).  $\lambda_{\max}(\text{CHCl}_3)/\text{nm}$  313 ( $\epsilon/\text{dm}^3 \text{ mol}^{-1} \text{ cm}^{-1}$ ;  $4.77 \times 10^4$ ).  $\delta_{\text{H}}$  (400 MHz; CDCl<sub>3</sub>; Me<sub>4</sub>Si) 7.44 (d,  $J = 8.4$  Hz, 4H, C3-*H* and C5-*H*, phenyl), 7.79 (d,  $J = 8.4$  Hz, 4H, C2-*H* and C6-*H*, phenyl), 8.61 (s, 2H, CH=N).  $\delta_{\text{C}}$  (100 MHz; CDCl<sub>3</sub>; Me<sub>4</sub>Si) 129.1 (CH-2 and C-6, phenyl), 129.7 (CH-3 and CH-5, phenyl), 132.4 (C<sub>quart</sub>-1, phenyl), 137.3 (C<sub>quart</sub>-4, phenyl), 161.1 (C=N) (see Fig. S9 and S10).

**1,2-bis(4-bromobenzylidene)hydrazine (3c).**

Yield/purity (1.78 g, 97/>98%). mp 223 °C (CH<sub>2</sub>Cl<sub>2</sub>/ether), lit. 223.5-224.5 °C.<sup>S3</sup>

Elemental analysis (Found: C, 46.21; H, 2.54; N, 7.90. Calc. For C<sub>14</sub>H<sub>10</sub>Br<sub>2</sub>N<sub>2</sub>: C, 45.94; H, 2.75; Br, 43.66; N, 7.65 %).  $\lambda_{\max}(\text{CHCl}_3)/\text{nm}$  316 ( $\epsilon/\text{dm}^3 \text{ mol}^{-1} \text{ cm}^{-1}$ ;  $4.30 \times 10^4$ ).  $\delta_{\text{H}}$  (400 MHz; CDCl<sub>3</sub>; Me<sub>4</sub>Si) 7.59 (d,  $J = 8.0$  Hz, 4H, C3-*H* and C5-*H*, phenyl), 7.71 (d,  $J = 8.0$  Hz, 4H, C2-*H* and C6-*H*, phenyl), 8.60 (s, 2H, CH=N).  $\delta_{\text{C}}$  (100 MHz; CDCl<sub>3</sub>; Me<sub>4</sub>Si) 125.8 (C<sub>quart</sub>-4, phenyl), 129.9 (CH-2 and C-6, phenyl), 132.1 (CH-3 and CH-5, phenyl), 132.9 (C<sub>quart</sub>-1, phenyl), 161.2 (C=N) (see Fig. S11 and S12).

**1,2-Bis(4-hydroxybenzylidene)hydrazine (3d).**

Yield/purity (1.18 g, 98/>98%). mp 267 °C (CHCl<sub>3</sub>), lit. 265-268 °C.<sup>S4</sup>

Elemental analysis (Found: C, 69.87; H, 5.06; N, 11.49. Calc. For C<sub>14</sub>H<sub>12</sub>N<sub>2</sub>O<sub>2</sub>: C, 69.99; H, 5.03; N, 11.66 %).  $\lambda_{\max}(\text{CH}_3\text{OH})/\text{nm}$  333 ( $\epsilon/\text{dm}^3 \text{ mol}^{-1} \text{ cm}^{-1}$ ;  $4.32 \times 10^4$ ).  $\delta_{\text{H}}$  (400 MHz; CD<sub>3</sub>OD/DMSO-d<sub>6</sub>, 10/1; Me<sub>4</sub>Si): 4.87 (s, 2H, OH, exchangeable signal), 6.86 (d,  $J = 8.4$

Hz, 4H, *CH*-3 and *CH*-5), 7.69 (d,  $J = 8.4$  Hz, 4H, *CH*-2 and *CH*-6), 8.52 (s, 2H, *CH*=N);  $\delta_C$  (100 MHz; CD<sub>3</sub>OD/DMSO-*d*<sub>6</sub>, 10/1; Me<sub>4</sub>Si) 115.7 (*CH*-3 and *CH*-5), 125.6 (*C*<sub>quart</sub>-1), 130.3 (*CH*-2 and *CH*-6), 160.6 (*CH* = N), 160.9 (*C*<sub>quart</sub>-4) (see Fig. S13 and S14).

**4,4'-hydrazine-1,2-diylidenebis(methan-1-yl-1-ylidene)bis(2,6-dimethoxyphenol)**

**(3e).**<sup>S5,S6</sup>

Yield/purity (1.75 g, 97/>98%). mp 214-215 °C (CHCl<sub>3</sub>/ether). Elemental analysis (Found: C, 60.13; H, 5.75; N, 7.61. Calc. For C<sub>18</sub>H<sub>20</sub>N<sub>2</sub>O<sub>6</sub>: C, 59.99; H, 5.59; N, 7.77 %).  $\lambda_{\max}$ (CHCl<sub>3</sub>)/nm 349 ( $\epsilon/\text{dm}^3 \text{ mol}^{-1} \text{ cm}^{-1}$ ;  $5.64 \times 10^4$ ).  $\delta_H$  (400 MHz; CDCl<sub>3</sub>; Me<sub>4</sub>Si) 3.97 (s, 6H, OCH<sub>3</sub>), 5.83 (br s, 2H, OH, exchangeable signal), 7.10 (s, 4H, C2-*H* and C6-*H*, phenyl), 8.56 (s, 2H, *CH*=N).  $\delta_C$  (100 MHz; CDCl<sub>3</sub>; Me<sub>4</sub>Si) 56.4 (OCH<sub>3</sub>), 105.3 (*CH*-2 and C-6, phenyl), 125.6 (*C*<sub>quart</sub>-1, phenyl), 137.7 (*C*<sub>quart</sub>-OH-4, phenyl), 147.2 (*C*<sub>quart</sub>-OMe-3 and *C*<sub>quart</sub>-OMe-5, phenyl), 161.4 (*C*=N) (see Fig. S15 and S16).

**1,2-bis(3-nitrobenzylidene)hydrazine (3f)**

Yield/purity (1.46 g, 97/>98%). mp 192-194 °C (CHCl<sub>3</sub>), lit. 195-196 °C.<sup>S2</sup> Elemental analysis (Found: C, 56.64; H, 3.09; N, 18.59. Calc. For C<sub>14</sub>H<sub>10</sub>N<sub>4</sub>O<sub>4</sub>: C, 56.38; H, 3.38; N, 18.78 %).  $\lambda_{\max}$ (CHCl<sub>3</sub>)/nm 279 ( $\epsilon/\text{dm}^3 \text{ mol}^{-1} \text{ cm}^{-1}$ ;  $4.78 \times 10^4$ ).  $\delta_H$  (400 MHz; CDCl<sub>3</sub>; Me<sub>4</sub>Si) 7.68 (t,  $J = J' = 8.0$  Hz, 2H, C5-*H*, phenyl), 8.18 (d,  $J = 8.0$  Hz, 2H, C4-*H*, phenyl), 8.36 (d,  $J' = 8.0$  Hz, 2H, C6-*H*), 8.73 (s, 4H, C2-*H*, phenyl and *CH*=N).  $\delta_C$  (100 MHz; CDCl<sub>3</sub>; Me<sub>4</sub>Si) 123.2 (*CH*-2, phenyl), 125.8 (*CH*-4, phenyl), 129.9 (*CH*-5, phenyl), 134.2 (*CH*-6, phenyl), 135.5 (*C*<sub>quart</sub>-1, phenyl), 148.7 (*C*<sub>quart</sub>-3 phenyl), 160.6 (*C*=N) (see Fig. S17 and S18).



**1,2-bis(4-nitrobenzylidene)hydrazine (3g)**

Yield/purity (1.45 g, 97/>97%). mp >300 °C, slightly dec. (CHCl<sub>3</sub>), lit. 299-302 °C.<sup>S4</sup> (Found: C, 56.33; H, 3.27; N, 18.92. Calc. For C<sub>14</sub>H<sub>10</sub>N<sub>4</sub>O<sub>4</sub>: C, 56.38; H, 3.38; N, 18.78 %).  $\lambda_{\max}(\text{CHCl}_3)/\text{nm}$  328 ( $\epsilon/\text{dm}^3 \text{ mol}^{-1} \text{ cm}^{-1}$ ;  $3.51 \times 10^4$ ).  $\delta_{\text{H}}$  (400 MHz; CDCl<sub>3</sub>/acetone-d<sub>6</sub> (2/1); Me<sub>4</sub>Si) 6.64 (d,  $J$  = 8.4 Hz, 4H, C2-*H* and C6-*H*, phenyl), 7.42 (d,  $J$  = 8.4 Hz, 4H, C3-*H* and C5-*H*, phenyl), 8.28 (s, 2H, CH=N),  $\delta_{\text{C}}$  (100 MHz; CDCl<sub>3</sub>/acetone-d<sub>6</sub> (2/1); Me<sub>4</sub>Si) 115.7 (CH-3 and CH-5, phenyl), 126.1 (*C*<sub>quart</sub>-1, phenyl), 130.1 (CH-2 and CH-6, phenyl), 159.8 (*C*<sub>quart</sub>-4, phenyl), 160.8 (C=N) (see Fig. S19 and S20).

**1,2-Bis(naphthalen-2-ylmethylene)hydrazine (3h).**

Yield/purity (1.49 g, 97/>98%). mp 233 °C (CHCl<sub>3</sub>), lit. 232-232.5 °C.<sup>S7</sup> Elemental analysis (Found: C, 85.63; H, 5.24; N, 8.98. Calc. For C<sub>22</sub>H<sub>16</sub>N<sub>2</sub>: C, 85.69; H, 5.23; N, 9.08 %).  $\lambda_{\max}(\text{CHCl}_3)/\text{nm}$  330 ( $\epsilon/\text{dm}^3 \text{ mol}^{-1} \text{ cm}^{-1}$ ;  $4.95 \times 10^4$ ).  $\delta_{\text{H}}$  NMR (400 MHz, CDCl<sub>3</sub>, Me<sub>4</sub>Si) 7.54-7.57 (m, 4H, naphthyl CHs), 7.87-7.95 (m, 6H, naphthyl CHs), 8.13-8.17 (m, 4H, naphthyl CHs), 8.88 (s, 2H, CH=N);  $\delta_{\text{C}}$  123.7, 126.7, 127.5, 127.9, 128.69, 128.71, 131.0 (CH, naphthyl), 131.8 (*C*<sub>quart</sub>-5), 133.2 (*C*<sub>quart</sub>-10), 134.9 (*C*<sub>quart</sub>-2), 162.4 (CH = N) (see Fig. S21 and S22).

**1,2-bis(1-(3-nitrophenyl)ethylidene)hydrazine (3i)**

Yield/purity (1.58 g, 97/>98%). mp 201-203 °C (CHCl<sub>3</sub>), lit. 202-203 °C.<sup>S2</sup> Elemental analysis (Found: C, 58.77; H, 4.16; N, 17.43. Calc. For C<sub>16</sub>H<sub>14</sub>N<sub>4</sub>O<sub>4</sub>: C, 58.89; H, 4.32; N, 17.17 %).  $\lambda_{\max}(\text{CHCl}_3)/\text{nm}$  271 ( $\epsilon/\text{dm}^3 \text{ mol}^{-1} \text{ cm}^{-1}$ ;  $7.74 \times 10^4$ ).  $\delta_{\text{H}}$  (400 MHz; CDCl<sub>3</sub>;

Me<sub>4</sub>Si) 2.41 (s, 6H, CH<sub>3</sub>), 7.63 (t, *J* = 8.0 Hz, 2H, C5-*H*, phenyl), 8.27-8.31 (m, 6H, C2-*H*, C4-*H* and C6-*H*, phenyl), 8.76 (s, 2H, CH=N). δ<sub>C</sub> (100 MHz; CDCl<sub>3</sub>; Me<sub>4</sub>Si) 15.2 (CH<sub>3</sub>), 121.6 (CH-2, phenyl), 124.5 (CH-4, phenyl), 129.4 (CH-5, phenyl), 132.4 (CH-6, phenyl), 139.6 (C<sub>quart</sub>-1, phenyl), 148.5 (C<sub>quart</sub>-3 phenyl), 156.7 (C=N) (see Fig. S23 and S24).

**1,2-bis(1-(4-methoxyphenyl)ethylidene)hydrazine (3j)**

Yield/purity (1.44 g, >97/>98 %). mp 200-202 °C (CHCl<sub>3</sub>/pentane). lit. 134-136 °C.<sup>S8</sup> Elemental analysis (Found: C, 73.06; H, 6.69; N, 9.71. Calc. For C<sub>18</sub>H<sub>20</sub>N<sub>2</sub>O<sub>2</sub>: C, 72.95; H, 6.80; N, 9.45 %). λ<sub>max</sub>(CHCl<sub>3</sub>)/nm 249 (ε/dm<sup>3</sup> mol<sup>-1</sup> cm<sup>-1</sup>; 1.15x10<sup>5</sup>). δ<sub>H</sub> (400 MHz; CDCl<sub>3</sub>; Me<sub>4</sub>Si) 2.32 (s, 6H, N=CCH<sub>3</sub>), 3.85 (s, 6H, OCH<sub>3</sub>), 6.94 (d, *J* = 8.8 Hz, 4H, C3-*H* and C5-*H*, phenyl), 7.88 (d, *J* = 8.8 Hz, 4H, C2-*H* and C6-*H*, phenyl); δ<sub>C</sub> (100 MHz; CDCl<sub>3</sub>; Me<sub>4</sub>Si) 14.8 (N=CCH<sub>3</sub>), 55.4 (OCH<sub>3</sub>), 113.6 (CH-3 and CH-5, phenyl), 128.1 (CH-2 and CH-6, phenyl), 131.3 (C<sub>quart</sub>-1, phenyl), 157.80 (C<sub>quart</sub>-4, phenyl), 160.79 (C=N) (see Fig. S25 and S26).

## 5. References

- S1. G. M. Sheldrick, *SHELXTL/PC Version 6.12 for Windows XP*, Bruker AXS Inc., Madison, WI, 2001.
- S2. Chattopadhyay, G.; Ray, S. P. *Synth. Commun.* **2011**, *41*, 2607-2614.
- S3. Ferguson, L. N.; Goodwin, T. C. *J. Am. Chem. Soc.* **1949**, *71*, 633-637.
- S4. Nanjundaswamy, H. M.; Pasha, M. A. *Synth. Commun.* **2007**, *37*, 3417-3410.
- S5. Rajendiran, N.; Balasubramanian, T. *Spectrochim. Acta, Part A* **2007**, *A68*, 894-904.
- S6. Kuznetsova, Y. A.; Romakh, V. B. *Appl. Biochem. Biotech.* **1996**, *61*, 205-209.
- S7. Kurteva, V. B.; Simeonov, S. P.; Stoilova-Disheva, M. *Pharmacol. Pharmacy* **2011**, *2*, 1-9.
- S8. Sauro, V. A.; Workentin, M. S. *J. Org. Chem.* **2001**, *66*, 831-838.

**Table S1. Structural data for 1,2-bis((E)-3-(2-methoxyphenyl)allylidene)hydrazine (3a)**

|                      |                                                                                                                        |
|----------------------|------------------------------------------------------------------------------------------------------------------------|
| Formula sum          | C <sub>20</sub> H <sub>20</sub> N <sub>2</sub> O <sub>2</sub>                                                          |
| Formula weight       | 320.38                                                                                                                 |
| Crystal system       | monoclinic                                                                                                             |
| Space group          | <i>P</i> 1 21/n 1 (no. 14)                                                                                             |
| Unit cell dimensions | $a = 19.0000(6) \text{ \AA}$<br>$b = 4.9688(2) \text{ \AA}$<br>$c = 19.2500(7) \text{ \AA}$<br>$\beta = 108.0()^\circ$ |
| Cell volume          | 1728.37(11) $\text{\AA}^3$                                                                                             |
| Z                    | 4                                                                                                                      |
| Density, calculated  | 1.231 g/cm <sup>3</sup>                                                                                                |
| R <sub>All</sub>     | 0.048                                                                                                                  |
| Pearson code         | mP176                                                                                                                  |
| Formula type         | NOP10Q10                                                                                                               |
| Wyckoff sequence     | e <sup>44</sup>                                                                                                        |

**Table S2. Selected bond distances and bond angles (Å , °)**

|                         |            |             |            |
|-------------------------|------------|-------------|------------|
| O1—C2                   | 1.359(2)   | C3—H3       | 0.950      |
| O1—C1                   | 1.422(2)   | C1—H1A      | 0.980      |
| O2—C12                  | 1.359(2)   | C1—H1B      | 0.980      |
| O2—C11                  | 1.422(2)   | C1—H1C      | 0.980      |
| N1—C10                  | 1.281(2)   | C14—C15     | 1.375(2)   |
| N1—N1 <sup>i</sup>      | 1.398(2)   | C14—C13     | 1.383(2)   |
| N2—C20                  | 1.281(2)   | C14—H14     | 0.950      |
| N2—N2 <sup>ii</sup>     | 1.398(3)   | C15—C16     | 1.375(3)   |
| C4—C3                   | 1.367(2)   | C15—H15     | 0.950      |
| C4—C5                   | 1.375(2)   | C16—C17     | 1.391(2)   |
| C4—H4                   | 0.950      | C16—H16     | 0.950      |
| C5—C6                   | 1.375(2)   | C17—C12     | 1.406(2)   |
| C5—H5                   | 0.950      | C17—C18     | 1.453(2)   |
| C6—C7                   | 1.391(2)   | C18—C19     | 1.336(2)   |
| C6—H6                   | 0.950      | C18—H18     | 0.950      |
| C7—C2                   | 1.406(2)   | C19—C20     | 1.422(2)   |
| C7—C8                   | 1.453(2)   | C19—H19     | 0.950      |
| C8—C9                   | 1.336(2)   | C20—H20     | 0.950      |
| C8—H8                   | 0.950      | C12—C13     | 1.383(2)   |
| C9—C10                  | 1.430(2)   | C11—H11A    | 0.980      |
| C9—H9                   | 0.950      | C11—H11B    | 0.980      |
| C10—H10                 | 0.950      | C11—H11C    | 0.980      |
| C2—C3                   | 1.383(2)   | C13—H13     | 0.950      |
|                         |            |             |            |
| C2—O1—C1                | 117.00(11) | H1A—C1—H1C  | 109.50     |
| C12—O2—C11              | 117.5(1)   | H1B—C1—H1C  | 109.50     |
| C10—N1—N1 <sup>i</sup>  | 111.50(17) | C15—C14—C13 | 120.50(16) |
| C20—N2—N2 <sup>ii</sup> | 111.50(17) | C15—C14—H14 | 119.60     |
| C3—C4—C5                | 120.00(14) | C13—C14—H14 | 119.60     |
| C3—C4—H4                | 119.80     | C16—C15—C14 | 119.50(14) |
| C5—C4—H4                | 119.80     | C16—C15—H15 | 120.20     |
| C6—C5—C4                | 119.50(16) | C14—C15—H15 | 120.20     |
| C6—C5—H5                | 120.20     | C15—C16—C17 | 121.50(15) |
| C4—C5—H5                | 120.20     | C15—C16—H16 | 119.20     |
| C5—C6—C7                | 121.50(14) | C17—C16—H16 | 119.20     |

|            |            |               |            |
|------------|------------|---------------|------------|
| C5—C6—H6   | 119.10     | C16—C17—C12   | 117.50(14) |
| C7—C6—H6   | 119.10     | C16—C17—C18   | 122.00(13) |
| C6—C7—C2   | 117.50(13) | C12—C17—C18   | 119.50(13) |
| C6—C7—C8   | 122.00(13) | C19—C18—C17   | 126.50(15) |
| C2—C7—C8   | 120.00(13) | C19—C18—H18   | 116.60     |
| C9—C8—C7   | 126.00(15) | C17—C18—H18   | 116.60     |
| C9—C8—H8   | 116.80     | C18—C19—C20   | 121.50(16) |
| C7—C8—H8   | 116.80     | C18—C19—H19   | 119.00     |
| C8—C9—C10  | 122.00(16) | C20—C19—H19   | 119.00     |
| C8—C9—H9   | 118.80     | N2—C20—C19    | 121.00(16) |
| C10—C9—H9  | 118.80     | N2—C20—H20    | 119.30     |
| N1—C10—C9  | 120.50(16) | C19—C20—H20   | 119.30     |
| N1—C10—H10 | 119.50     | O2—C12—C13    | 124.00(12) |
| C9—C10—H10 | 119.50     | O2—C12—C17    | 115.00(12) |
| O1—C2—C3   | 124.00(13) | C13—C12—C17   | 120.50(13) |
| O1—C2—C7   | 115.00(12) | O2—C11—H11A   | 109.50     |
| C3—C2—C7   | 120.00(14) | O2—C11—H11B   | 109.50     |
| C4—C3—C2   | 120.00(14) | H11A—C11—H11B | 109.50     |
| C4—C3—H3   | 119.80     | O2—C11—H11C   | 109.50     |
| C2—C3—H3   | 119.80     | H11A—C11—H11C | 109.50     |
| O1—C1—H1A  | 109.50     | H11B—C11—H11C | 109.50     |
| O1—C1—H1B  | 109.50     | C12—C13—C14   | 119.50(14) |
| H1A—C1—H1B | 109.50     | C12—C13—H13   | 120.20     |
| O1—C1—H1C  | 109.50     | C14—C13—H13   | 120.20     |

---

**Symmetry codes:**

(i) 0.5-x, 1.5+y, 1.5-z; (ii) 0.5-x, 1.5+y, 0.5-z.

### Table S3. CheckCIF/PLATON report

Structure factors have been supplied for datablock(s) chem158

No syntax errors found. CIF dictionary Interpreting this report

#### Datablock: chem158

---

|                        |                                             |                                |
|------------------------|---------------------------------------------|--------------------------------|
| Bond precision:        | C-C = 0.0021 Å                              | Wavelength=0.71073             |
| Cell:                  | a=19.0367(6)    b=4.9902(2)    c=19.2908(7) |                                |
|                        | alpha=90    beta=108.317(2)    gamma=90     |                                |
| Temperature:           | 170 K                                       |                                |
|                        | Calculated                                  | Reported                       |
| Volume                 | 1739.72(11)                                 |                                |
|                        | 1739.71(11) Space group                     | P 21/n                         |
|                        | P2(1)/n                                     |                                |
| Hall group             | -P 2yn                                      | ? Moiety formula C20 H20 N2 O2 |
| Sum formula            | C20 H20 N2 O2                               | C20 H20 N2 O2                  |
| Mr                     | 320.38                                      | 320.38                         |
| Dx, g cm <sup>-3</sup> | 1.223                                       | 1.223                          |
| Z                      | 4                                           | 4                              |
| Mu (mm <sup>-1</sup> ) | 0.080                                       | 0.080                          |
| F000                   | 680.0                                       | 680.0                          |
| F000'                  | 680.28                                      |                                |
| h, k, lmax             | 23, 6, 23                                   | 23, 6, 23                      |
| Nref                   | 3420                                        | 3368                           |
| Tmin, Tmax             | 0.976, 0.984                                | 0.976, 0.984                   |
| Tmin'                  | 0.976                                       |                                |

Correction method= NONE

Data completeness= 0.985    Theta(max)= 26.000

R(reflections)= 0.0387( 2766)    wR2(reflections)=

0.1075( 3368) S = 0.835    Npar= 220

---

The following ALERTS were generated. Each ALERT has the format

**test-name\_ALERT\_alert-type\_alert-level.**

Click on the hyperlinks for more details of the test.

---

#### Alert level C

ABSTY03\_ALERT\_1\_C The \_exptl\_absorpt\_correction\_type has been given as none. However values have been given for Tmin and Tmax. Remove these if an absorption correction has not been applied.

(cont.d)

```

From the CIF: _exptl_absorpt_correction_T_min      0.976
From the CIF: _exptl_absorpt_correction_T_max      0.984
PLAT911_ALERT_3_C Missing # FCF Refl Between THmin & STh/L= 0.600      50
PLAT912_ALERT_4_C Missing # of FCF Reflections Above STh/L= 0.600      2

```

---

### Alert level G

```

PLAT005_ALERT_5_G No _iucr_refine_instructions_details in CIF .... ?
PLAT128_ALERT_4_G Alternate Setting of Space-group P21/c .....
P21/n

```

---

```

0 ALERT level A = Most likely a serious problem - resolve or explain
0 ALERT level B = A potentially serious problem, consider carefully
3 ALERT level C = Check. Ensure it is not caused by an omission or oversight
2 ALERT level G = General information/check it is not something unexpected

1 ALERT type 1 CIF construction/syntax error, inconsistent or missing data
0 ALERT type 2 Indicator that the structure model may be wrong or deficient
1 ALERT type 3 Indicator that the structure quality may be low
2 ALERT type 4 Improvement, methodology, query or suggestion
1 ALERT type 5 Informative message, check

```

---

It is advisable to attempt to resolve as many as possible of the alerts in all categories. Often the minor alerts point to easily fixed oversights, errors and omissions in your CIF or refinement strategy, so attention to these fine details can be worthwhile. In order to resolve some of the more serious problems it may be necessary to carry out additional measurements or structure refinements. However, the purpose of your study may justify the reported deviations and the more

serious of these should normally be commented upon in the discussion or experimental section of a paper or in the "special\_details" fields of the CIF. checkCIF was carefully designed to identify outliers and unusual parameters, but every test has its limitations and alerts that are not important in a particular case may appear. Conversely, the absence of alerts does not guarantee there are no aspects of the results needing attention. It is up to the individual to critically assess their own results and, if necessary, seek expert advice.

### Publication of your CIF in IUCr journals

A basic structural check has been run on your CIF. These basic checks will be run on all CIFs submitted for publication in IUCr journals (*Acta Crystallographica*, *Journal of Applied Crystallography*, *Journal of Synchrotron Radiation*); however, if you intend to submit to *Acta Crystallographica Section C* or *E*, you should make sure that full publication checks are run on the final version of your CIF prior to submission.

### Publication of your CIF in other journals

Please refer to the *Notes for Authors* of the relevant journal for any special instructions relating to CIF submission.

---

**PLATON version of 27/06/2011; check.def file version of 27/06/2011**  
**(cont.d)**



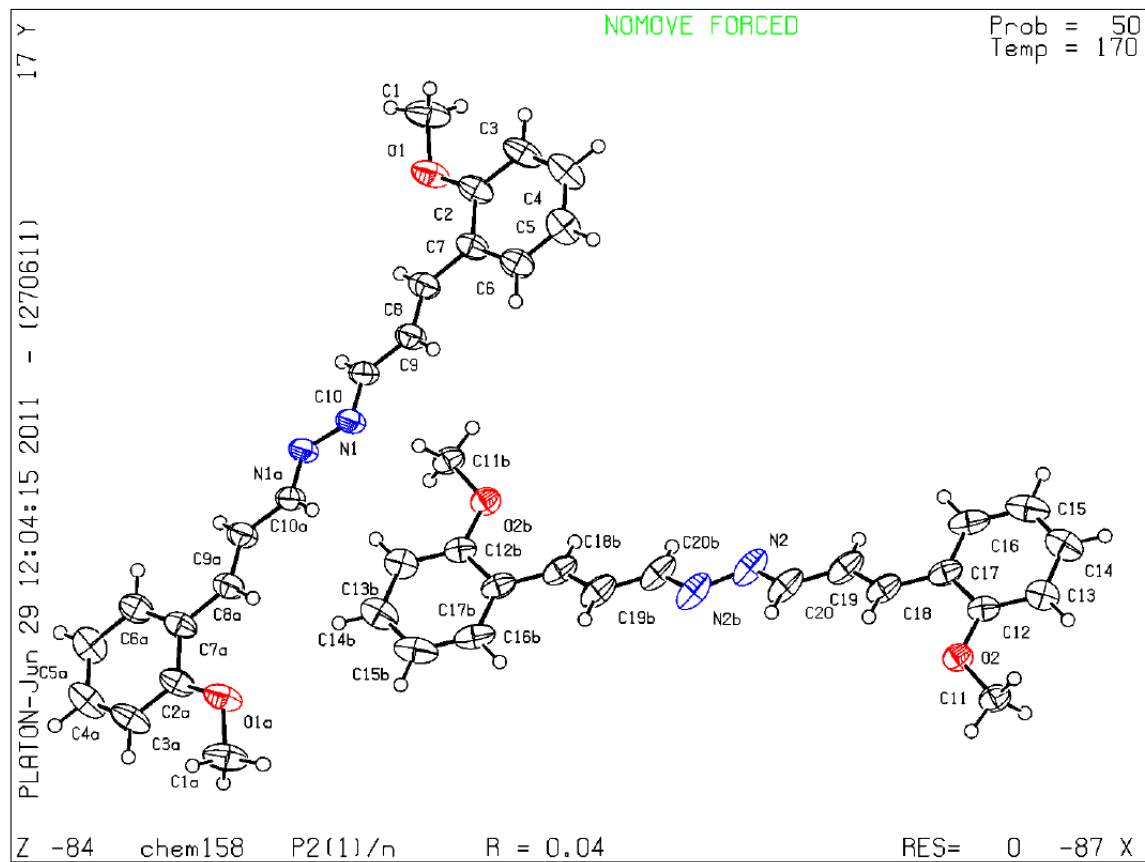

**Fig. S1**  $^1\text{H}$  NMR Spectrum of **3a**

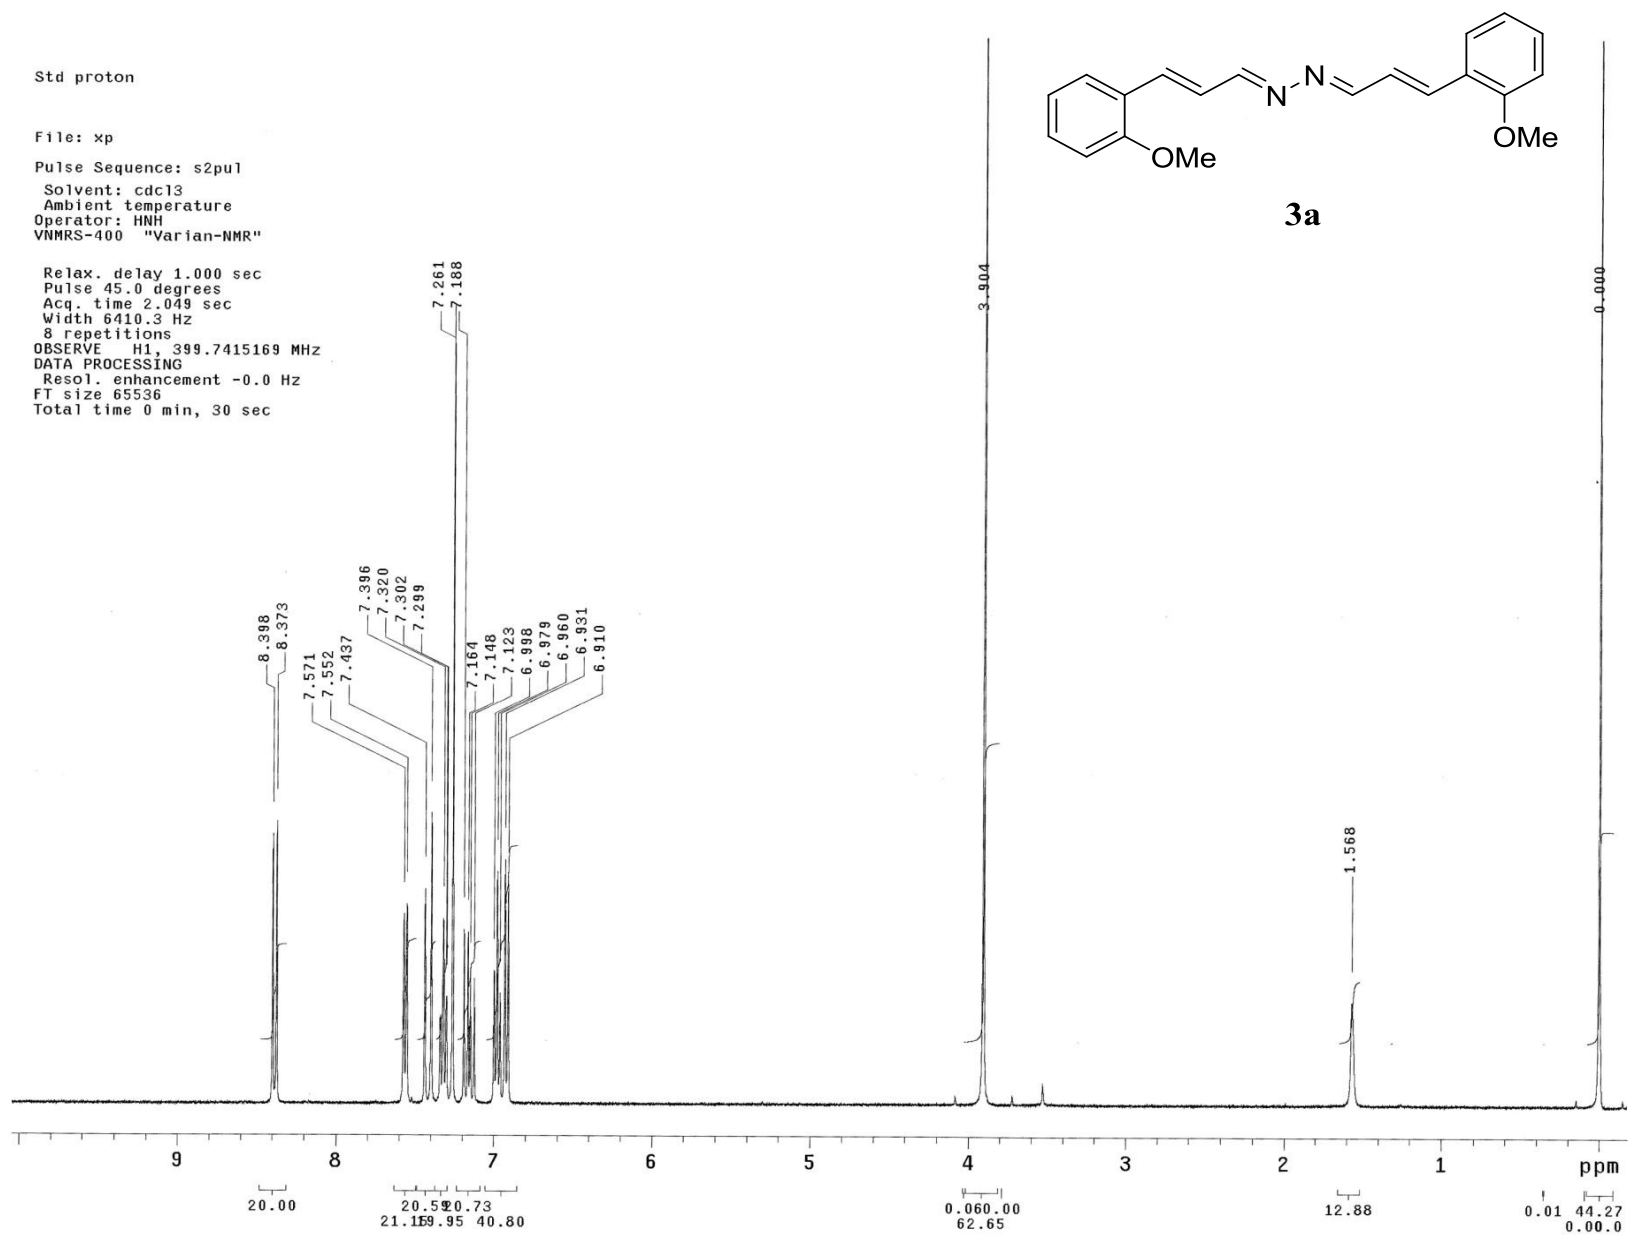

**Fig. S2** Enhanced  $^1\text{H}$  NMR Spectrum of **3a**

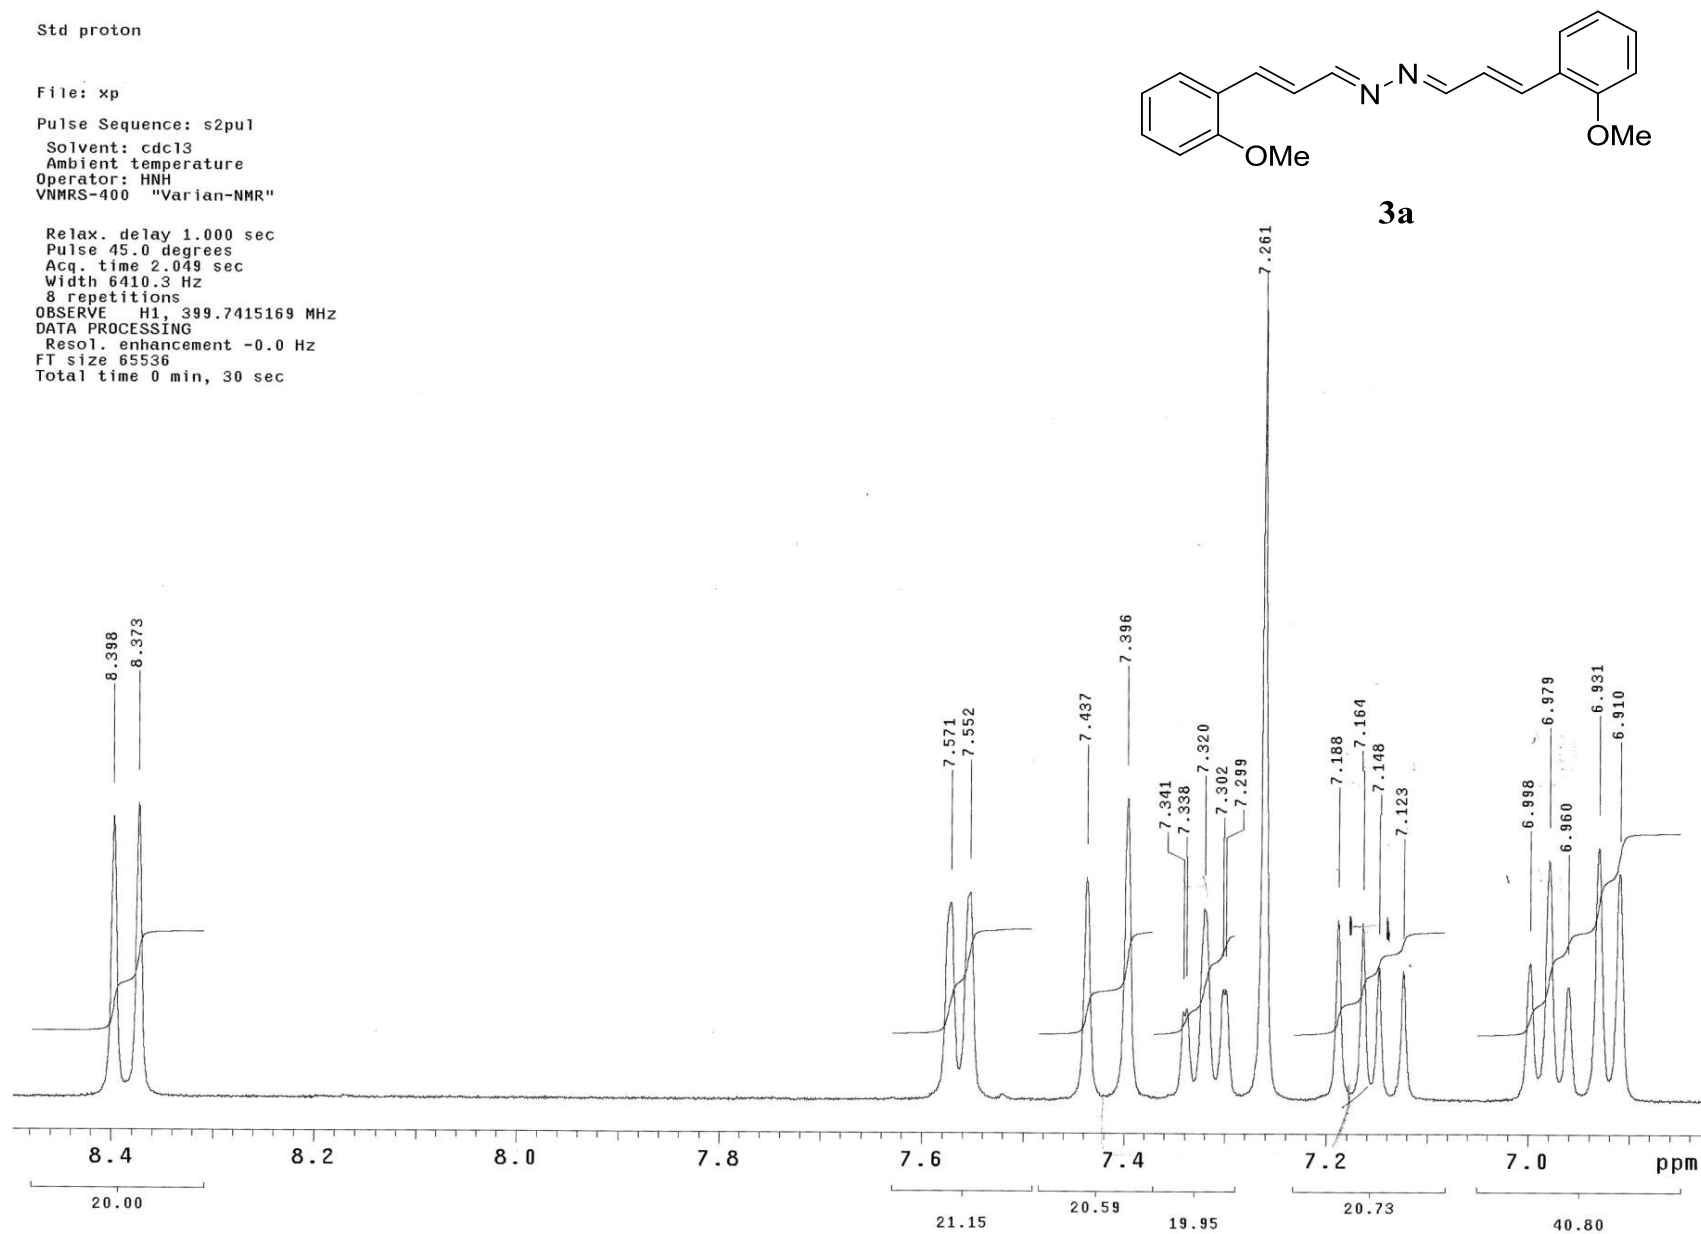

**Fig. S3**  $^{13}\text{C}$  NMR Spectrum of **3a**

Std carbon

File: xp

Pulse Sequence: s2pu1

Solvent: cdc13

Ambient temperature

Operator: HNH

VNMR-400 "Varian-NMR"

Relax. delay 1.000 sec

Pulse 45.0 degrees

Acq. time 1.300 sec

Width 24509.8 Hz

32 repetitions

OBSERVE C13, 100.5150857 MHz

DECOUPLE H1, 399.7435210 MHz

Power 37 dB

continuously on

WALTZ-16 modulated

DATA PROCESSING

Line broadening 0.5 Hz

FT size 65536

Total time 9 min, 49 sec

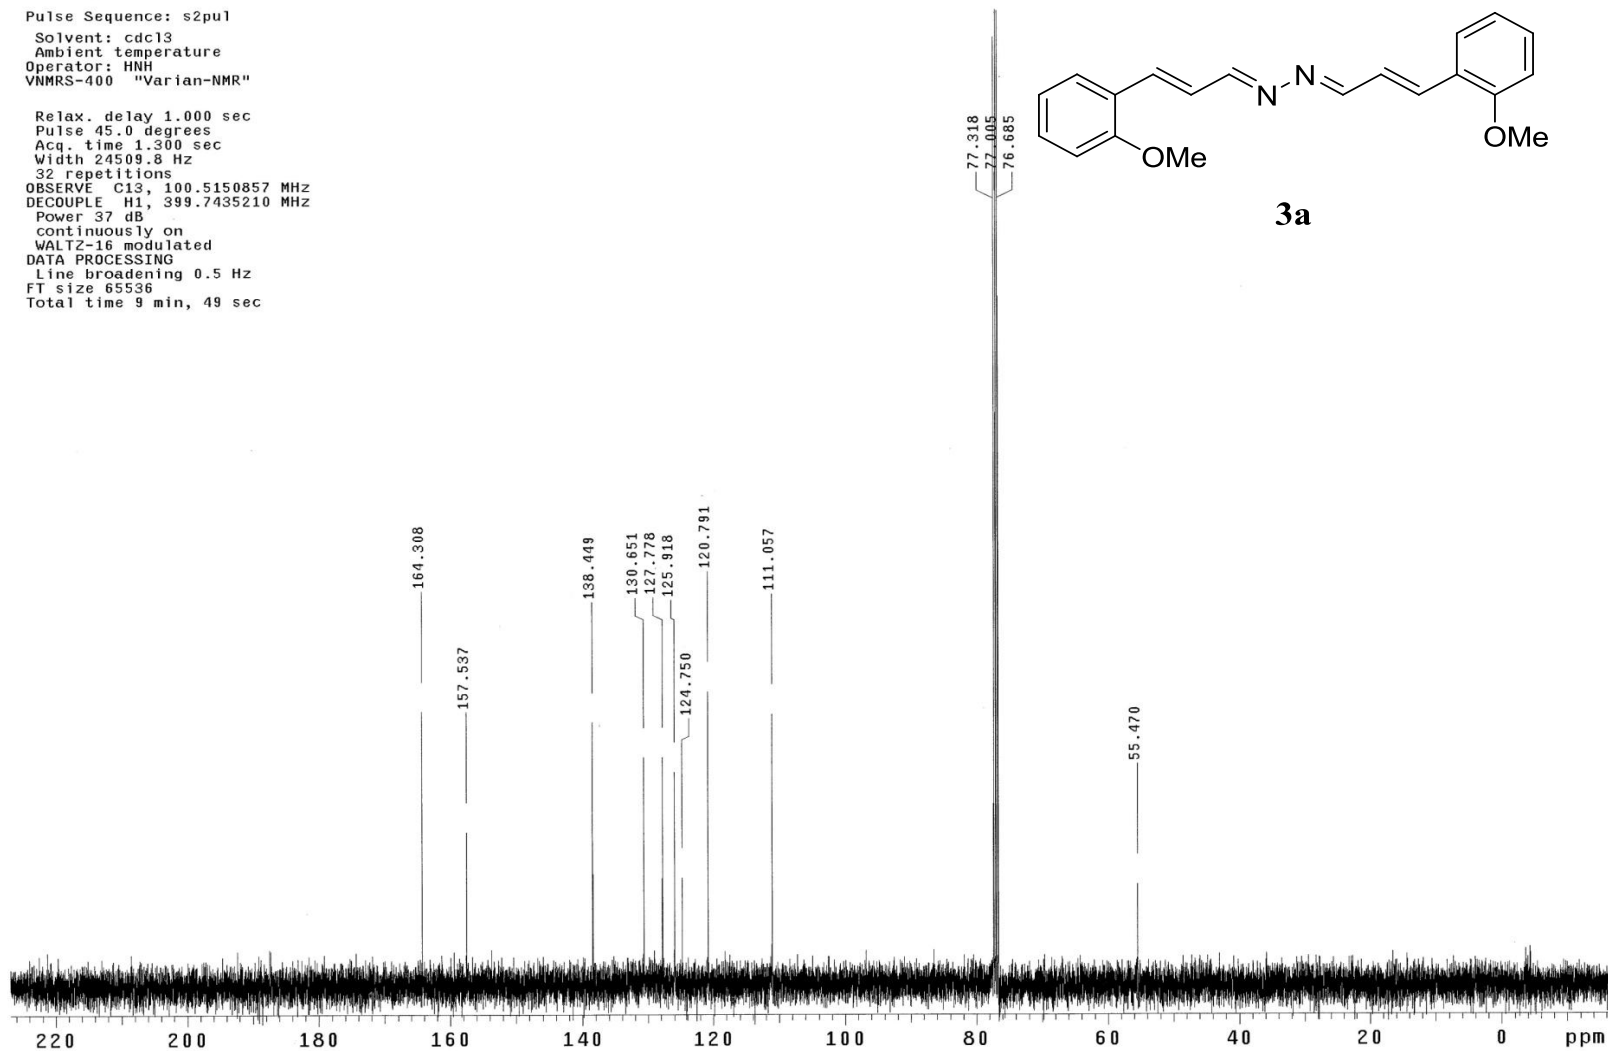

**Fig. S4** COSY NMR Spectrum of **3a**

Std proton

File: home/vnmr1/vnmrsys/data/HNH/LKH/2011/10/1001-methoxy-cinnam-new-compound-gcosy.fid

Pulse Sequence: gCOSY

Solvent: cdcl3

Ambient temperature

Operator: HNH

File: 1001-methoxy-cinnam-new-compound-gcosy

VNMR-400 "Varian-NMR2"

Relax. delay 1.000 sec

Acq. time 0.160 sec

Width 6410.3 Hz

2D Width 6410.3 Hz

2 repetitions

128 increments

OBSERVE H1, 399.7324022 MHz

DATA PROCESSING

Sine bell 0.080 sec

F1 DATA PROCESSING

Sine bell 0.040 sec

FT size 2048 x 2048

Total time 5 min, 20 sec

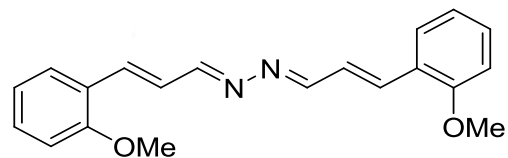

**3a**

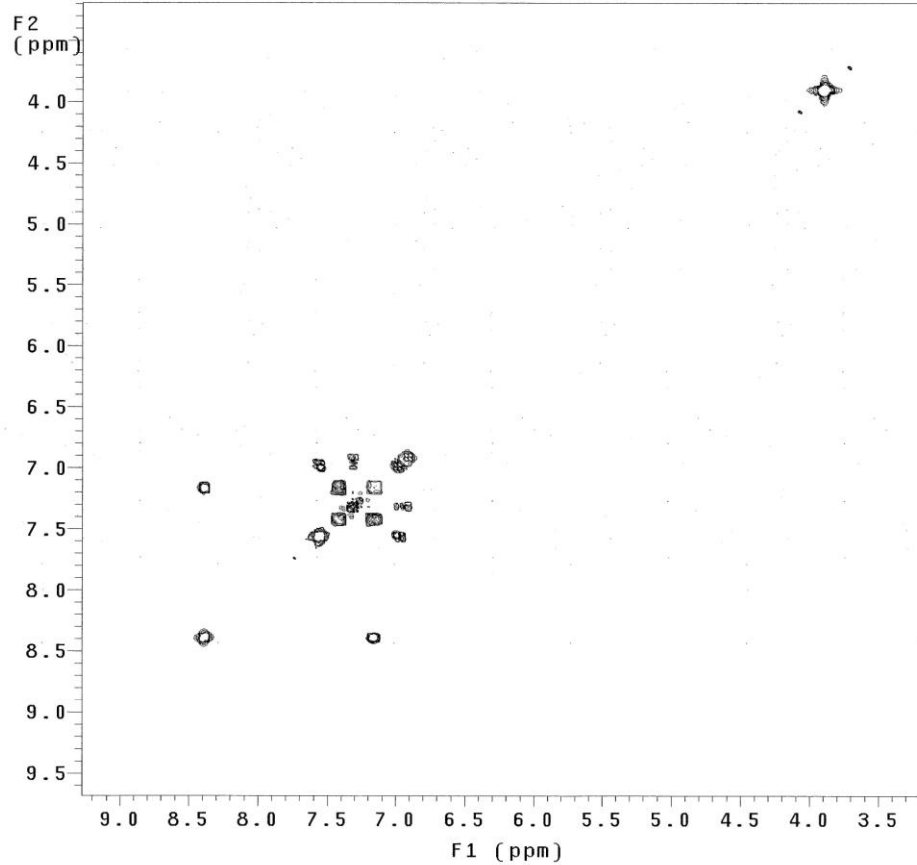

**Fig. S5 Hetero COSY NMR Spectrum of 3a**

Std proton

Sample: 1006\_GHSQC  
File: home/vnmr1/vnmrsys/data/HNH/1006\_GHSQC.fid  
Pulse Sequence: gHSQC  
Solvent: cdcl3  
Ambient temperature  
Operator: HNH  
File: 1006\_GHSQC  
VNMR-400 "Varian-NMR2"

Relax. delay 1.000 sec  
Acq. time 0.199 sec  
Width 6410.3 Hz  
2D Width 20100.5 Hz  
4 repetitions  
2 x 128 increments  
OBSERVE H1, 399.7324022 MHz  
DECOUPLE C13, 100.5218386 MHz  
Power 36 dB  
on during acquisition  
off during delay  
W40\_oneprobe modulated  
DATA PROCESSING  
Gauss apodization 0.092 sec  
F1 DATA PROCESSING  
Gauss apodization 0.012 sec  
FT size 4096 x 2048  
Total time 21 min, 48 sec

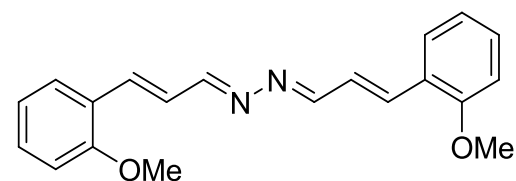

**3a**

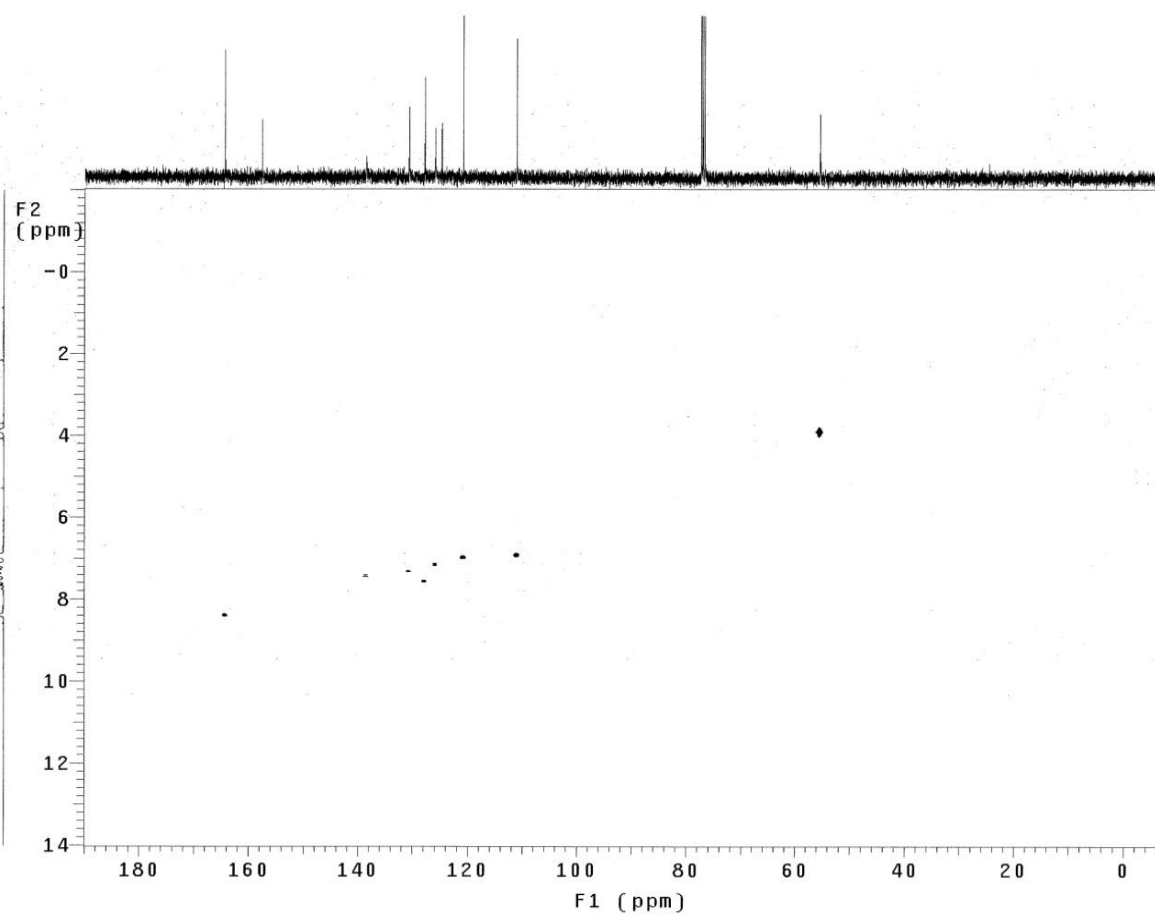

**Fig. S6**  $^1\text{H}$  NMR spectra for the change of **2a** with **1** to **3a**

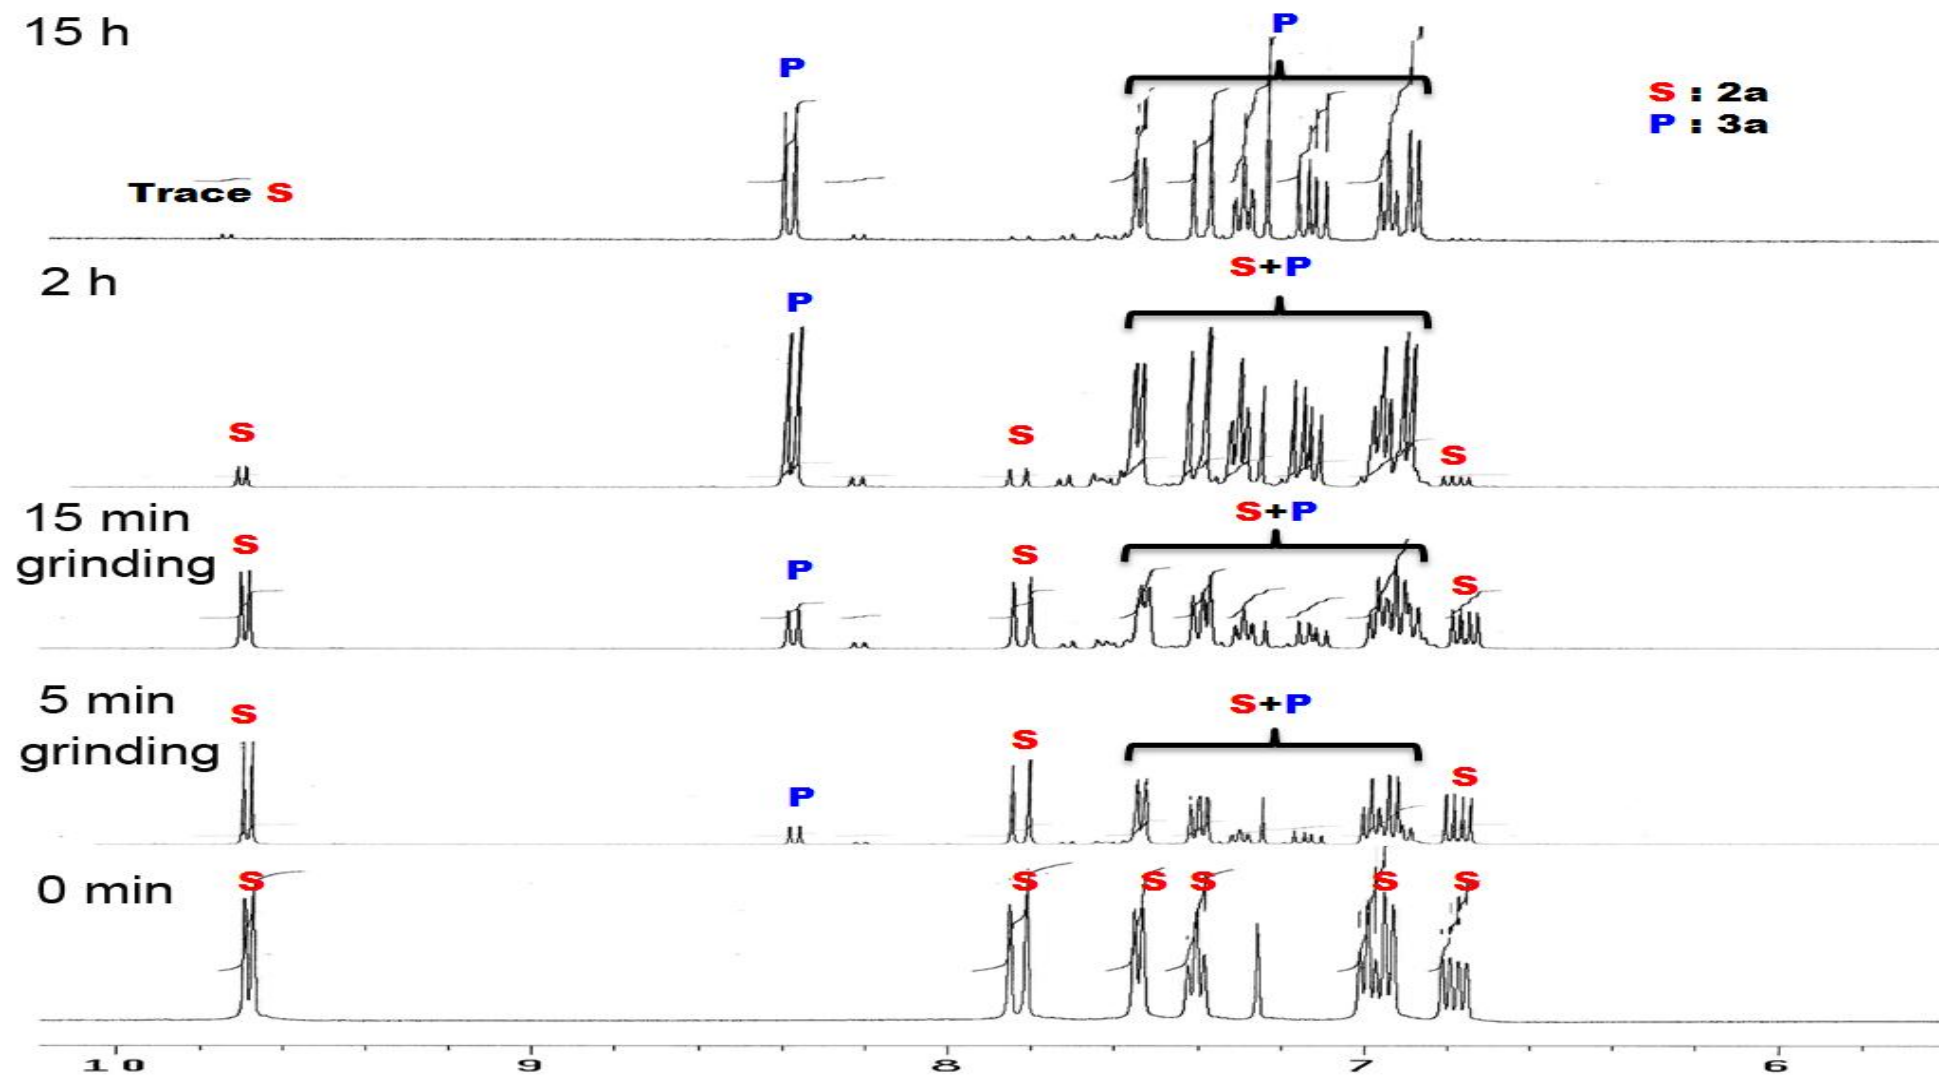

**Fig. S7** The  $^1\text{H}$  NMR spectrum for the reaction of **2a** with hydrazine hydrate in ether solvent.

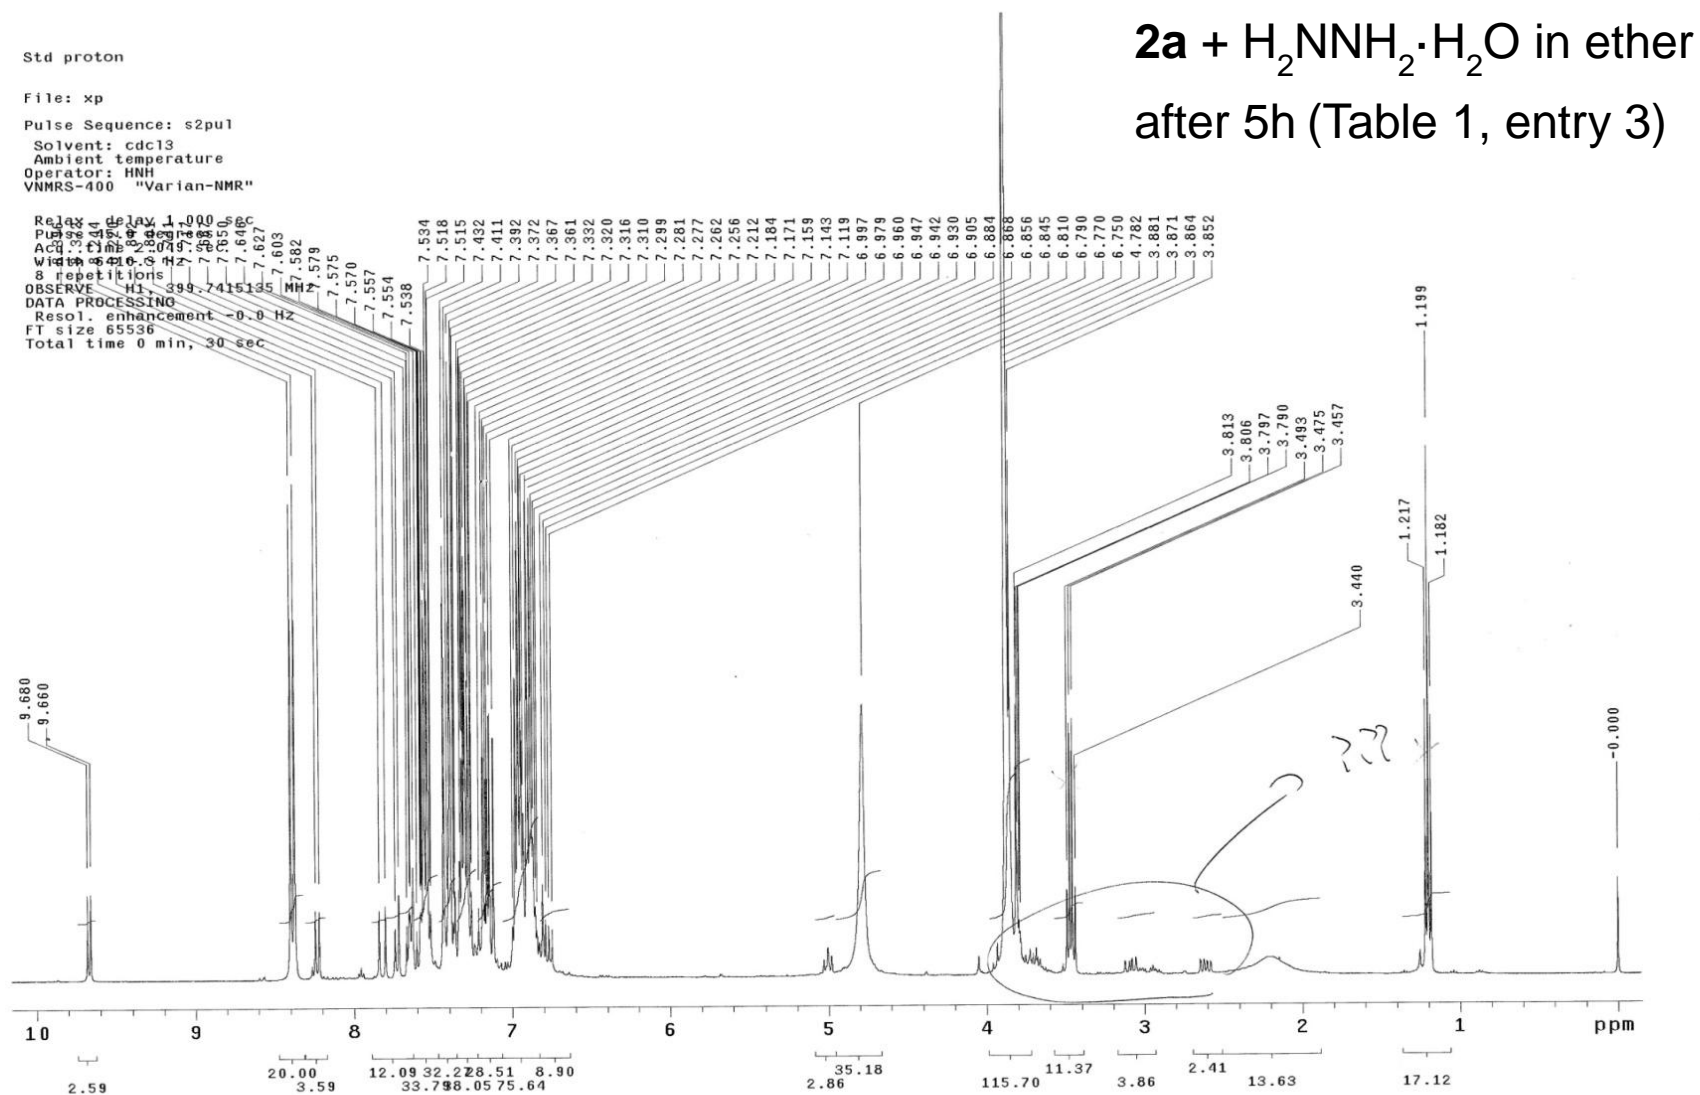



**Fig. S8** The  $^1\text{H}$  NMR spectrum for the reaction of **2a** with hydrazine hydrate in the absence of a solvent.

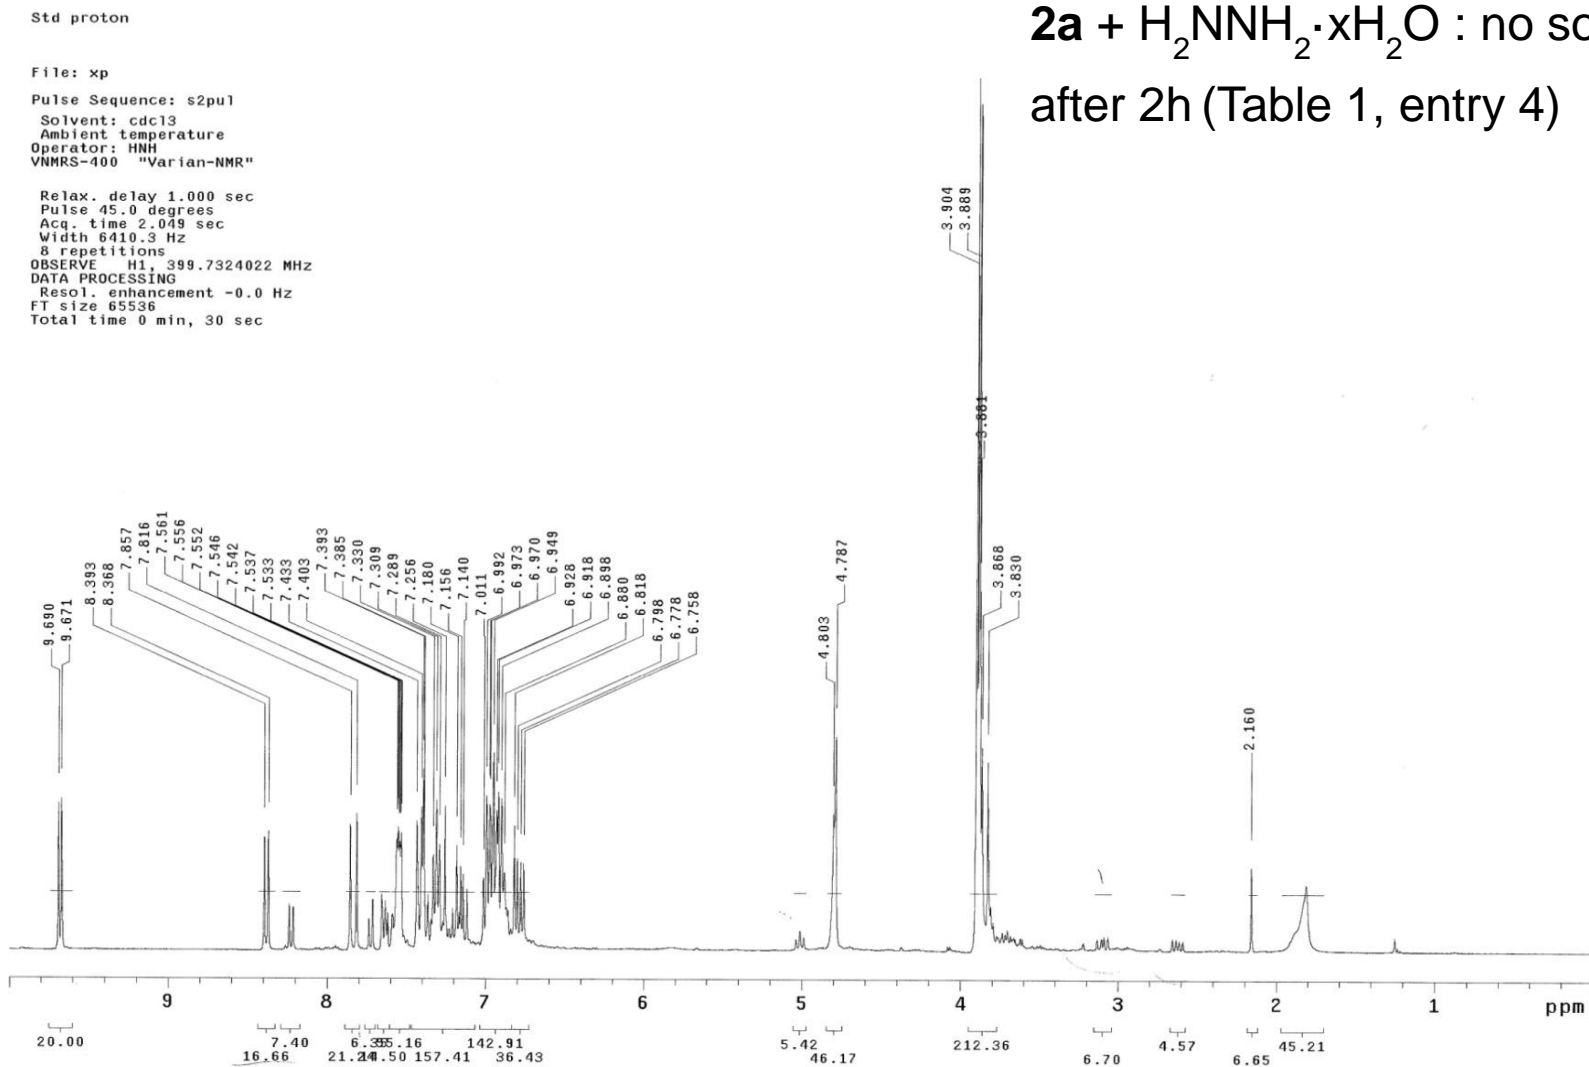

Supplement: Supplementary file 1 [file 4213810]
